# Supplementary material for: Diagnosis and Management of Secondary HLH/MAS Following HSCT and CAR-T Cell Therapy in Adults; A Review of the Literature and a Survey of Practice Within EBMT Centres on Behalf of the Autoimmune Diseases Working Party (ADWP) and Transplant Complications Working Party (TCWP)
Source: PubMed Central journal article supplement (PMC7137396; doi:10.3389/fimmu.2020.00524), 2020-03-31
Supplement: Data_Sheet_1.pdf [file Data_Sheet_1.pdf]

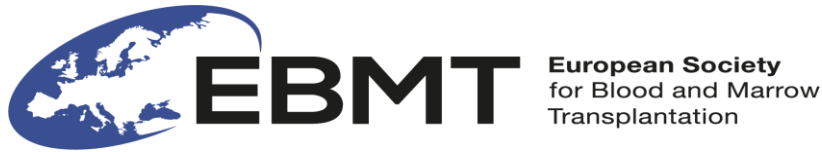

Welcome to the EBMT survey of sHLH/MAS post-HSCT or CAR-T therapy. Please complete the following questions regarding adult patients (aged 18 and over) managed in your centre in 2016, 2017 and 2018 inclusive.

**Question (Q) 1 to 4 : identification of centres**

**Q5.** How many cases of sHLH/MAS following **autologous** HSCT are you aware of in your centre between 2016-2018 inclusive (we will find the total number of transplantations for your CIC from the EBMT registry)

0    1    2    3    4    5    6    7    8    9    10

                            

**Q6.** How many cases of sHLH/MAS following **allogeneic** HSCT are you aware of in your centre between 2016-2018 inclusive (we will find the total number of transplantations for your CIC from the EBMT registry)

0    1    2    3    4    5    6    7    8    9    10

                            

**Q7.** Have you performed CAR-T therapy in your centre?

No    Yes

**If yes**

**Q7a.** Please state the total number of patients treated with CAR-T therapy (on or off trial) in your centre between 2016-2018 inclusive

**Q7b.** How many cases of sHLH/MAS, following CAR-T therapy, are you aware of in your centre between 2016-2018 inclusive?

0    1    2    3    4    5    6    7    8    9    10

**Q8.** In your programme, do you use published criteria for sHLH/MAS to support diagnosis post HSCT and CAR-T cell therapy?

- No     Yes

**if yes.** Which published criteria are you using ? (see below for details of criteria) (Tick all that apply)

- HLH-2004 criteria (Henter et al, 2007)
- H-score (Fardet et al, 2014)
- HLH/MAS post-HSCT criteria (Takagi et al, 2009)
- PRINTO (Ravelli et al, 2016)
- MD Anderson criteria (FOR CAR-T only) (Neelapu et al, 2018)
- Other, specify

**Q9.** In your programme, do you have an approved protocol or SOP to pre-emptively screen for sHLH/MAS in patients post-HSCT or CAR-T cell therapy?

- No     Yes

**Q9.a. Autologous HSCT:** do you have an approved protocol or SOP to pre-emptively screen for sHLH/MAS in patients post-autologous HSCT?

- No
- Yes, when the clinical picture is suspicious for sHLH/MAS
- Yes, routinely

**Q9.a (i).** Frequency of screening after **autologous** HSCT

- Daily
- Weekly
- Fortnightly (every 2 weeks)
- Monthly
- Other

**Q9.a (ii).** For how long do you screen these patients after **autologous** HSCT?

- 3 months
- 6 months
- 12 months
- Other

**Q9.b Allogeneic HSCT:** do you have an approved protocol or SOP to pre-emptively screen for sHLH/MAS in patients post-allogeneic HSCT?

- No
- Yes, when the clinical picture is suspicious for sHLH/MAS
- Yes, routinely

**Q9.b (i).** Frequency of screening after **allogeneic** HSCT

- Daily
- Weekly
- Fortnightly (every 2 weeks)
- Monthly
- Other

**Q9.b (ii).** For how long do you screen these patients after allogeneic HSCT?

- 3 months
- 6 months
- 12 months
- Other

**Q9.c CAR-T :** do you have an approved protocol or SOP to pre-emptively screen for sHLH/MAS in patients post-CAR-T therapy?

- No
- Yes, when the clinical picture is suspicious for sHLH/MAS
- Yes, routinely

**Q9.c (i).** Frequency of screening after CAR-T therapy

- Daily
- Weekly
- Fortnightly (every 2 weeks)

- Monthly
- Other

**Q9.c (ii)** For how long do you screen these patients after CAR-T therapy?

- 3 months
- 6 months
- 12 months
- Other

**Q10.** Do any clinical or laboratory features help you differentiate between sHLH/MAS and severe cytokine-release syndrome (CRS) following CAR-T therapy?

**Q11.** If you do perform screening, what are your screening markers? (Tick all that apply)

- Serum ferritin
- Soluble CD25/sIL-2r
- NK cell activity
- Other

**Q11.a** Serum ferritin: please indicate what measurement is considered a significant result

**Q11.b** Soluble CD25/sIL-2r : please indicate what measurement is considered a significant result

**Q11.c** NK cell activity : please indicate what measurement is considered a significant result

**Q11.d.**For other drugs : please indicate what measurement is considered a significant result for each drug

**Q12.** .If you use ferritin, what is your cut off to help determine likelihood of sHLH/MAS (free text)?

**Q13.** Do you have an approved protocol or SOP to treat sHLH/MAS in patients post-HSCT and CAR-T cell therapy?

- No  Yes

**Q13.a.** If yes, describe its basis e.g. does it follow international recommendations for management of sHLH/MAS? Specify which.

**Q14.** In your programme, which agents would/do you use to treat sHLH/MAS? (tick all that apply)

- Corticosteroids
- Monoclonal antibody therapy (e.g. rituximab, alemtuzumab, emapalumab other please specify)
- Chemotherapy (e.g. etoposide, methotrexate, other please specify)
- JAK inhibitors (e.g. baricitinib, other please specify)
- Cytokine blockade (e.g. tocilizumab, siltuximab, anakinra)
- Other supportive care, please specify

**Q14.a** Please specify which one(s)

**Q14.b** If you use corticosteroids

- IV pulses only
- IV followed by oral
- Oral only
- Other

**Q15.** If you have indicated that you have managed cases of sHLH/MAS following HSCT or CAR-T therapy, are you happy to be contacted in the future about a retrospective study of these patients?

- No
- Yes
- Other
